# Supplementary material
Source: PubMed Central journal article supplement (PMC5614838)
Supplement: NIHMS895892-supplement-2.pdf [file NIHMS895892-supplement-2.pdf]

**Lu&Tucciarone-NN-Supplementary Table 1**

**Table1. Kinetics of uIPSC in PCs innervated by ChCs and PVBCs in PL upper layers.**

| Type     | n  | Amplitude (pA) |      | Rising ( $\mu$ s) |     | Decay (ms) |      | Latency ( $\mu$ s) |     |
|----------|----|----------------|------|-------------------|-----|------------|------|--------------------|-----|
|          |    | mean           | sem  | mean              | sem | mean       | sem  | mean               | sem |
| ChC→PC   | 36 | 31.6           | 3.4  | 430               | 27  | 3.04       | 0.11 | 933                | 52  |
| PVBC→PC  | 31 | 77.9           | 15.3 | 420               | 29  | 2.68       | 0.19 | 681                | 32  |
| <i>p</i> |    | **             |      | 0.68              |     | 0.015, *   |      | ***                |     |

The membrane potential of PCs were held at -75 mV under voltage-clamping; samples with 10-20 M $\Omega$  series resistance were included, and all recordings with 85-95% compensation. *Rising*: the time from 10% to 90% of IPSC amplitude in the rising phase; *Decay*: time from 90% to 37% of the IPSC amplitude in the decay phase; *Latency*: from the peak of presynaptic APs or stimulation artifacts to the onset of IPSC (10% of peak in the rising phase). Data presented by mean  $\pm$  s.e.m..

Mann-Whitney test: \*:  $p < 0.05$ ; \*\*:  $p < 0.01$ ; \*\*\*,  $p < 0.001$ .
